# Supplementary material
Source: Springer Nature journal article supplement (https://www.springermedizin.de/resource/supplementary/12985_2014_2470_MOESM4_ESM.pdf/9606786)

**A**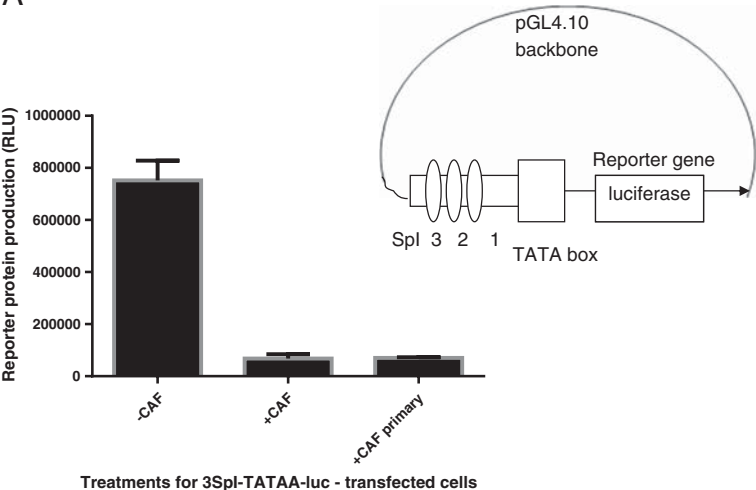**B**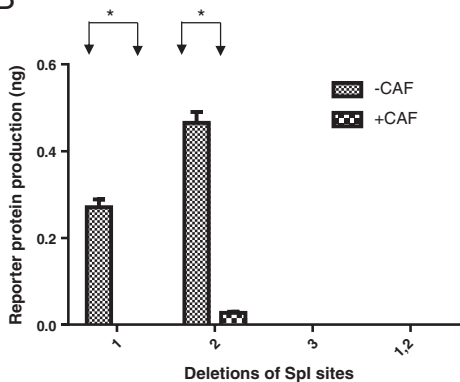**C**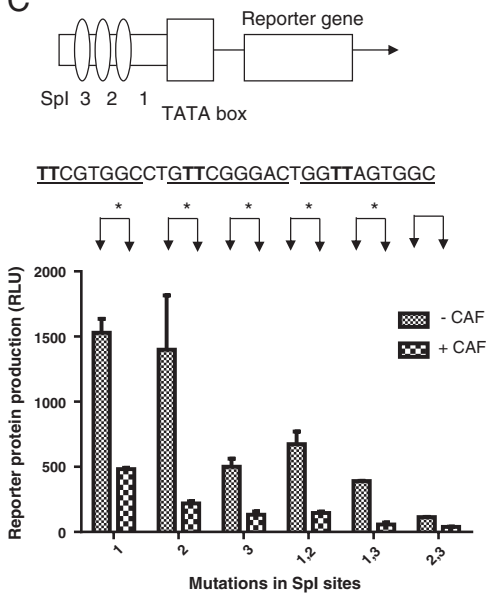

Supplement: MOESM4 [file 9606786]
